# Supplementary material
Source: publisher site journal article supplement (https://www.dovepress.com/article/449324)
Supplement: Supplementary file 1 [file get_supplementary_file.php]

ORIGINAL RESEARCH

Suwen Huang1*, Yanchu Wang1,2*, Jinrong Zhu1,3* et al

**Systemic Inflammatory Response Index, a Potential Inflammatory Biomarker in Disease Severity of Myasthenia Gravis: A Pilot Retrospective Study**

Suwen Huang1*, Yanchu Wang1,2*, Jinrong Zhu1,3*, Shengqi Li1,2, Shenyi Lin1,2, Wei Xie1,2, Siyao Chen1,2, Yukai Wang1,3, Lingsheng Wang1,2, Qiaoqiao Jin1,2, Yiyun Weng1, Dehao Yang4

1Department of Neurology, The First Affiliated Hospital of Wenzhou Medical University, Wenzhou, Zhejiang, China

2The First School of Medicine, School of Information and Engineering, Wenzhou Medical University, Wenzhou, China

3The Second School of Medicine, Wenzhou Medical University, Wenzhou, China

4Department of Neurology, The Second Affiliated Hospital, Zhejiang University School of Medicine, Hangzhou, China

*These authors contributed equally to this work

**Correspondence:**

Yiyun Weng, Department of Neurology, The First Affiliated Hospital of Wenzhou Medical University, Nanbaixiang Street, Ouhai District, Wenzhou 325000, Zhejiang, China. E-mail: wengyiyun2012@126.com. Tel: +86-0577-55579371. Fax: +86-0577-55579318.

Dehao Yang, Department of Neurology, The Second Affiliated Hospital, Zhejiang University School of Medicine, Hangzhou 310009, Zhejiang, China. E-mail: dehao_yang@zju.edu.cn.

**Catalogs**

**Supplementary Tables**..............................................................................................................................................................3

Supplementary Table 1. Logistic regression analysis assessing different factors of worse disease severity with crisis patients excluded......................................................................................................................................................................................3

Supplementary Table 2. Correlation between SIRI and ADL in subgroups................................................................................4

Supplementary Table 3. Comparisons between SIRI and other inflammatory biomarkers as well as single blood cell counts..........................................................................................................................................................................................5

**Supplementary Figure**..............................................................................................................................................................6

Supplementary Figure 1. Scatter plot of the correlation between SIRI and ADL with crisis patients excluded........................6

**Supplementary Table 1.** Logistic regression analysis assessing different factors of worse disease severity with crisis patients excluded

|  | Univariate Logistic regression | | |  | Multivariate logistic regression | | |
| --- | --- | --- | --- | --- | --- | --- | --- |
|  | OR | 95% CI | *p* value |  | OR | 95% CI | *p* value |
| Age (years) | 1.021 | 0.977-1.067 | 0.345 |  | 1.031 | 0.972-1.093 | 0.313 |
| Sex (male, *n*%) | 1.130 | 0.304-4.200 | 0.855 |  | 1.206 | 0.242-6.018 | 0.820 |
| Disease duration (months) | 1.009 | 1.001-1.016 | 0.028 |  | 1.001 | 0.990-1.013 | 0.816 |
| Recent onset (months) | 0.788 | 0.455-1.364 | 0.395 |  |  |  |  |
| Primary onset (*n*%) | 1.020 | 0.204-5.092 | 0.981 |  |  |  |  |
| History of MG medication (*n*%) | 0.362 | 0.099-1.327 | 0.125 |  |  |  |  |
| Smoking (*n*%) | 3.000 | 0.366-24.606 | 0.306 |  |  |  |  |
| Hypertension (*n*%) | 1.265 | 0.312-5.132 | 0.742 |  |  |  |  |
| Diabetes mellitus (*n*%) | 1.766 | 0.212-14.690 | 0.599 |  |  |  |  |
| Thymoma (*n*%) | 0.681 | 0.077-5.987 | 0.729 |  | 0.207 | 0.015-2.889 | 0.242 |
| Thymectomy (*n*%) | 0.264 | 0.061-1.146 | 0.075 |  |  |  |  |
| Prehospital infection (*n*%) | 0.057 | 0.013-0.244 | < 0.001 |  |  |  |  |
| Cholinesterase inhibitor (*n*%) | 1.603 | 0.388-6.617 | 0.514 |  |  |  |  |
| Glucocorticoid (*n*%) | 0.910 | 0.521-3.298 | 0.886 |  |  |  |  |
| Immunosuppressor (*n*%) | 0.653 | 0.159-2.692 | 0.556 |  |  |  |  |
| Azathioprine | 0.290 | 0.029-2.877 | 0.291 |  |  |  |  |
| Intravenous immunoglobulin (*n*%) | 0.682 | 0.182-2.550 | 0.569 |  |  |  |  |
| SIRI | 1.552 | 1.197-2.012 | 0.001 |  | 1.592 | 1.166-2.174 | 0.003 |
| NLR | 1.098 | 1.022-1.180 | 0.011 |  |  |  |  |
| PLR | 1.006 | 1.002-1.011 | 0.005 |  |  |  |  |
| LMR | 0.337 | 0.173-0.659 | 0.001 |  |  |  |  |
| SII | 1.000 | 1.000-1.001 | 0.004 |  |  |  |  |

Abbreviations: MG, Myasthenia gravis; SIRI, system inflammation response index; NLR, neutrophil-to-lymphocyte ratio; PLR, platelet-to-lymphocyte ratio; LMR, lymphocyte-to-monocyte ratio; SII, systemic immune-inflammation index.

**Supplementary Table 2.** Correlation between SIRI and ADL in subgroups.

| Subgroup | Spearman r | *p* value |
| --- | --- | --- |
| Age (> 60) |  |  |
| Yes | 0.273 | 0.073 |
| No | 0.211 | 0.050 |
| Sex (male) |  |  |
| Yes | 0.319 | 0.016 |
| No | 0.182 | 0.120 |
| History of MG medication |  |  |
| Yes | 0.043 | 0.806 |
| No | 0.227 | 0.027 |
| Smoking |  |  |
| Yes | 0.230 | 0.198 |
| No | 0.235 | 0.020 |
| Hypertension |  |  |
| Yes | 0.241 | 0.120 |
| No | 0.224 | 0.036 |
| Prehospital infection |  |  |
| Yes | 0.384 | 0.086 |
| No | 0.134 | 0.163 |
| Glucocorticoid |  |  |
| Yes | 0.329 | 0.007 |
| No | 0.023 | 0.856 |
| Immunosuppressor |  |  |
| Yes | 0.071 | 0.705 |
| No | 0.282 | 0.004 |
| Intravenous immunoglobulin |  |  |
| Yes | 0.087 | 0.589 |
| No | 0.163 | 0.125 |

Abbreviations: MG, Myasthenia gravis.

**Supplementary Table 3.** Comparisons between SIRI and other inflammatory biomarkers as well as single blood cell counts

|  | AUC (95% CI) | *p* value | Cutoff value | Sensitivity (%) | Specificity (%) | PPV | NPV | Delong Test |
| --- | --- | --- | --- | --- | --- | --- | --- | --- |
| ROC |  |  |  |  |  |  |  |  |
| SIRI | 0.802 (0.728-0.864) | < 0.001 | 2.753 | 64.3 | 91.5 | 44.99 | 95.94 | Ref |
| NLR | 0.807 (0.733-0.868) | < 0.001 | 2.599 | 85.7 | 65.1 | 21.05 | 97.67 | 0.836 |
| PLR | 0.748 (0.669-0.817) | 0.006 | 173.451 | 71.4 | 80.6 | 28.57 | 96.30 | 0.409 |
| LMR | 0.766 (0.687-0.832) | < 0.001 | 3.419 | 78.6 | 62.0 | 18.34 | 96.39 | 0.420 |
| SII | 0.805 (0.730-0.866) | < 0.001 | 1105.412 | 64.3 | 88.4 | 37.50 | 95.80 | 0.953 |
| Adjusted ROC |  |  |  |  |  |  |  |  |
| SIRI | 0.824 (0.751-0.882) | 0.003 | / | 92.9 | 65.1 | 22.41 | 98.83 | Ref |
| NLR | 0.774 (0.696-0.839) | 0.021 | / | 71.4 | 77.5 | 25.62 | 96.15 | 0.142 |
| PLR | 0.823 (0.751-0.882) | 0.004 | / | 64.3 | 89.1 | 39.03 | 95.83 | 0.983 |
| LMR | 0.817 (0.744-0.877) | 0.003 | / | 85.7 | 70.5 | 23.97 | 97.85 | 0.881 |
| SII | 0.771 (0.693-0.837) | 0.008 | / | 64.3 | 93.0 | 49.92 | 96.00 | 0.236 |

Adjusted for age, sex, disease duration, history of MG medication and thymoma.

Abbreviations: SIRI, system inflammation response index; NLR, neutrophil-to-lymphocyte ratio; PLR, platelet-to-lymphocyte ratio; LMR, lymphocyte-to-monocyte ratio; SII, systemic immune-inflammation index; PPV, positive predictive value ; NPV, negative predictive value.


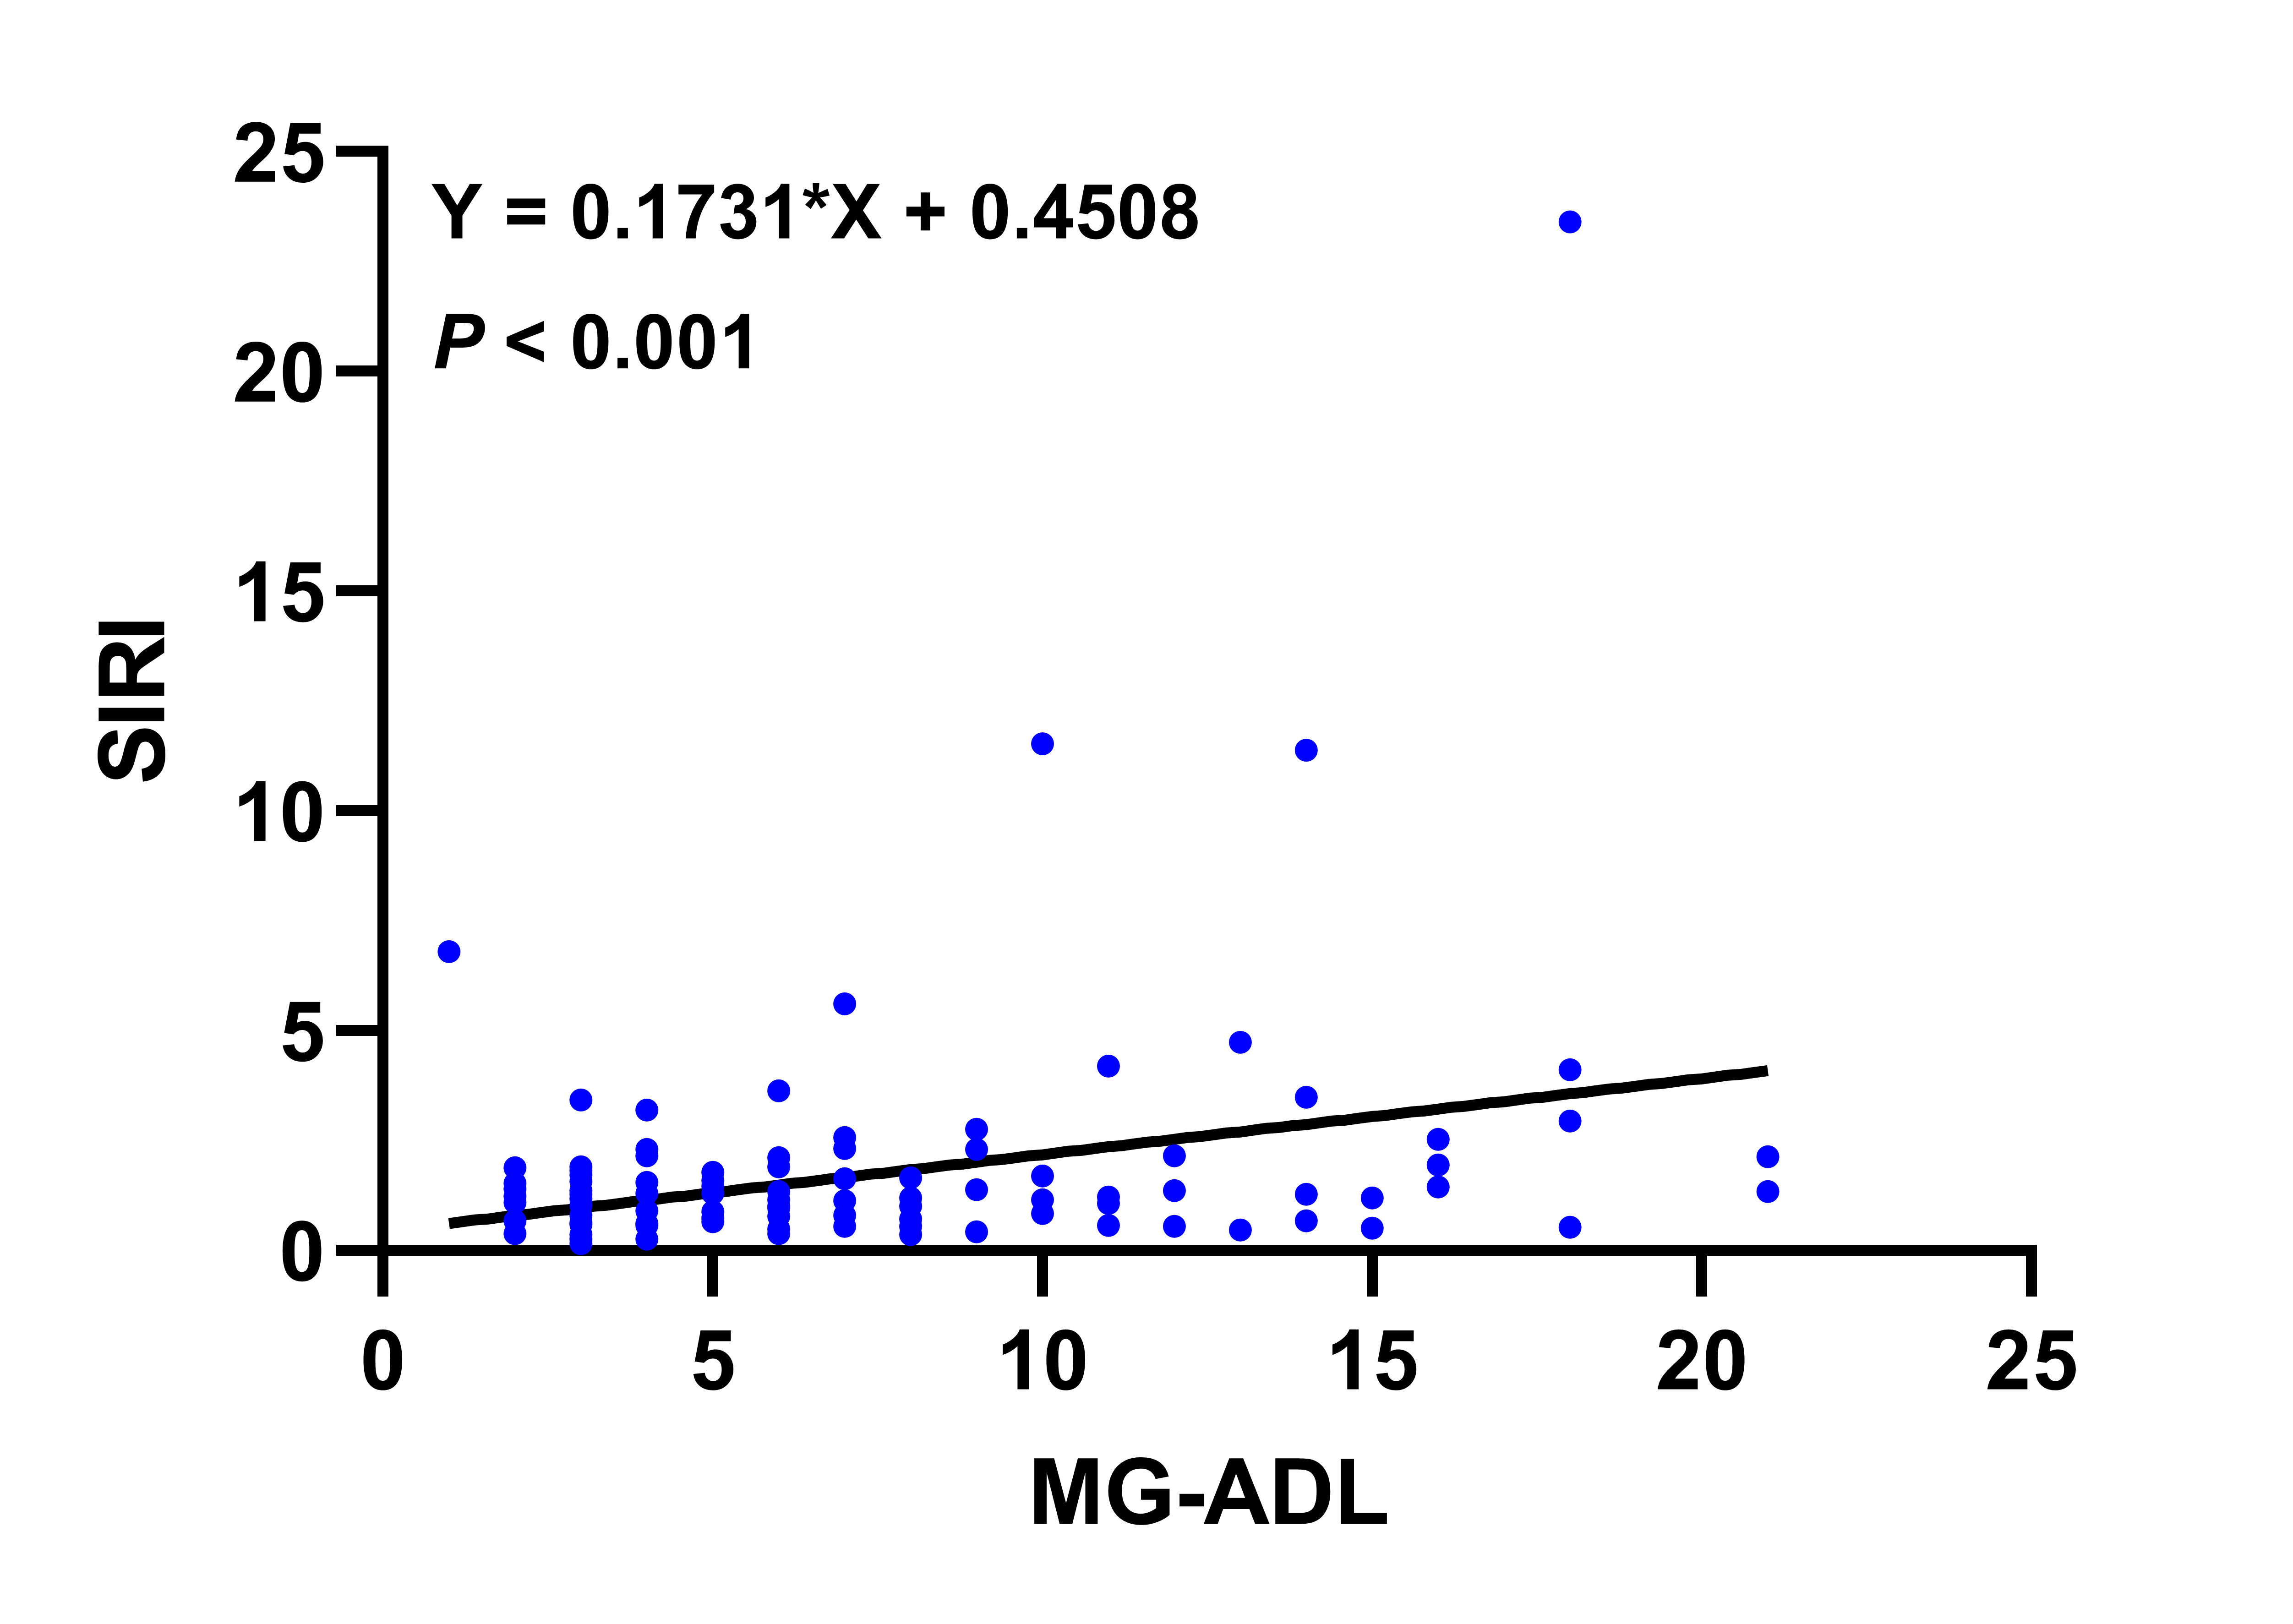


**Supplementary Figure 1. Scatter plot of the correlation between SIRI and ADL with crisis patients excluded.** Consistent with previous results, SIRI remained positively associated with ADL after the exclusion of crisis patients. Spearman correlation analysis showed a strong correlation between SIRI and ADL (r = 0.1962, p = 0.028). The results of linear fitting (Y = 0.1731*X + 0.4508, p < 0.001) also support the positive correlation between them.
